# Supplementary material for: Modelling of the Steel High-Temperature Deformation Behaviour Using Artificial Neural Network
Source: MDPI journal article supplement (doi:10.3390/met12030447), 2022-03-04
Supplement: s1 [file s1]

# Modelling of the Steel High-Temperature Deformation Behavior Using Artificial Neural Network

Ge <sup>1,\*</sup>, Hui Liu <sup>2,3</sup>, Xingxing Ding <sup>1</sup>, Yanyan Liu <sup>2,4</sup>, Xingsheng Li <sup>2</sup>, Xianli Wu <sup>2</sup> and Baojun Li <sup>1,\*</sup>

<sup>1</sup> Department of Physical Metallurgy of Non-Ferrous Metals, National University of Science and Technology "MISIS", Leninskiy Prospekt 4, 119049 Moscow, Russia; m1805037@edu.misis.ru

<sup>2</sup> Joint-stock company "Advanced Research Institute of Inorganic Materials named after Academician A.A. Bochvar", Rogova str. 5a, 123098 Moscow, Russia, tachuryumova@bochvar.ru

\* Correspondence: churyumov@misis.ru; Tel.: +7-495-955-0134

The constructed artificial neural network may be described by the following formulas:

$$y_i = \tanh [bo_{out} + \sum_{k=1}^p wk_{out} \tanh \{bk_{2h} + \sum_{j=1}^n wkj_{2h} \tanh (bj_{1h} + \sum_{m=1}^m wji_{1h} xi_m)\}] \quad (S1)$$

Where  $y_i$  is a code value of the output parameter;

$bo_{out}$  is a bias value of the output layer  $bo_{out} = -1.9871$ ;

$p$  is a number of the neurons in the second hidden layer ( $p=15$ );

$wk_{out}$  are the synapse values between  $k$ -th neuron in the second hidden layer and output layer;

$bk_{2h}$  are the bias values of  $k$ -th neurons in the second hidden layer;  $n$  a number of the neurons in the first hidden layer ( $p=30$ );

$wkj_{2h}$  are the synapse values between  $k$ -th neuron in the second hidden layer and  $j$ -th neuron in the first hidden layer;

$bj_{1h}$  are the bias values of  $j$ -th neurons in the first hidden layer;  $m$  is a number of input parameters;

$wji_{1h}$  are the synapse values between  $j$ -th neuron in the first hidden layer and  $i$ -th input parameter;

$xi$  is an code value of the  $i$ -th input parameter.

The calculation of the coded values of the input parameters was made using the following formula:

$$xi = 1.8Xi \frac{Xmax - Xmin}{Xmax - Xmin} + 0.9 - 1.8 \frac{Xmax - Xmin}{Xmax - Xmin} \quad (S2)$$

where  $Xi$ ,  $Xmax$ ,  $Xmin$  are the current, maximum and minimum real values of the input parameters (maximum and minimum values are presented in the Table S1).

Calculation of the real value of the true stress may be determined using the following formula:

$$True\ stress = y_i - 0.9 - 1.8 \frac{Ymax - Ymin}{Ymax - Ymin} + 0.9 - 1.8 \frac{Ymax - Ymin}{Ymax - Ymin} \quad (S3)$$

where  $Ymax$ ,  $Ymin$  are the maximum and minimum real values of the true stress which were used for the ANN construction ( $Ymax = 808.6\ MPa$ ,  $Ymin = 0.91\ MPa$ ).

The values of the biases and synapses are presented in Tables

**Table S1.** The values of the neuron's biases in the hidden layers.

| Neuron number | $b1h_j$ | $b2h_k$ |
|---------------|---------|---------|
| 1             | 3.3276  | 0.5404  |
| 2             | -0.4222 | 0.5156  |
| 3             | 1.4999  | -0.3671 |
| 4             | -0.0583 | 0.5386  |
| 5             | 1.2189  | -0.0428 |
| 6             | 0.0697  | 0.3828  |
| 7             | -0.4248 | 0.1176  |
| 8             | -1.3468 | 0.5359  |
| 9             | -1.3637 | 0.5258  |
| 10            | -0.3958 | -0.6897 |
| 11            | -0.2718 | 0.0458  |
| 12            | -3.9270 | -3.0092 |
| 13            | -7.2307 | -1.2704 |
| 14            | -0.3054 | 1.5706  |
| 15            | -6.9983 | -0.9832 |
| 16            | 2.6126  | -       |
| 17            | -0.1399 | -       |
| 18            | 2.3584  | -       |
| 19            | 0.0607  | -       |
| 20            | 1.3235  | -       |
| 21            | 2.9790  | -       |
| 22            | -0.7381 | -       |
| 23            | -1.4009 | -       |
| 24            | 5.6806  | -       |
| 25            | 0.0076  | -       |
| 26            | 0.4586  | -       |
| 27            | 1.9211  | -       |
| 28            | -0.6790 | -       |
| 29            | 0.1577  | -       |
| 30            | -0.7737 | -       |

**Table S2.** The values of the synapses between  $j^{\text{th}}$  neuron in the first hidden layer and  $i^{\text{th}}$  input parameter ( $w^{ij}$ )

|                                   | The neuron number in the first hidden layer (j) |         |         |         |         |         |         |         |         |         |         |         |         |         |         |         |         |         |         |         |         |         |         |         |         |         |         |         |         |         |         |
|-----------------------------------|-------------------------------------------------|---------|---------|---------|---------|---------|---------|---------|---------|---------|---------|---------|---------|---------|---------|---------|---------|---------|---------|---------|---------|---------|---------|---------|---------|---------|---------|---------|---------|---------|---------|
| The number of input parameter (i) |                                                 | 1       | 2       | 3       | 4       | 5       | 6       | 7       | 8       | 9       | 10      | 11      | 12      | 13      | 14      | 15      | 16      | 17      | 18      | 19      | 20      | 21      | 22      | 23      | 24      | 25      | 26      | 27      | 28      | 29      | 30      |
|                                   | 1                                               | -0.0315 | -0.1307 | -0.0099 | 0.1771  | -0.4946 | -0.4094 | 0.1785  | -0.4468 | -0.0509 | -0.0489 | 0.0318  | 0.1446  | 0.7561  | 3.9082  | -0.1538 | -0.0389 | -0.9227 | -0.2632 | -0.9483 | -0.8539 | -1.0049 | -0.7301 | -0.4344 | 0.6046  | -0.5148 | 0.0782  | 0.6630  | 0.5024  | -1.0347 | -0.0629 |
|                                   | 2                                               | 2.2400  | -0.1094 | 0.9769  | 0.7579  | 0.0423  | 0.0246  | 0.4799  | -0.2106 | -0.0909 | -2.2722 | 0.6335  | -0.1535 | -0.2204 | 1.2676  | 0.7625  | 0.4698  | 3.2664  | 0.0028  | 1.2694  | 1.6332  | 0.0617  | 0.7346  | 0.0684  | -1.5371 | -0.4308 | 0.6318  | 0.4075  | -0.9931 | -0.9904 | -0.7387 |
|                                   | 3                                               | -0.0454 | 0.1923  | 1.6042  | -0.1393 | -0.0559 | 0.2692  | 0.7448  | -0.1243 | 0.0600  | -0.6128 | 1.7160  | 1.0865  | -0.1395 | -0.4562 | -0.5495 | 0.9709  | 0.1655  | -2.1201 | 0.8968  | -0.2434 | -0.4185 | 0.3059  | -0.7573 | 0.5188  | -0.4306 | -1.1750 | 1.0671  | -0.3475 | -1.0792 | 0.1719  |
|                                   | 4                                               | -0.1852 | 0.9861  | 0.2426  | -1.4839 | 0.3314  | 2.3066  | -0.2395 | 0.3022  | 0.2089  | -0.1228 | 0.2058  | -0.4245 | 0.5236  | -0.0492 | -0.4295 | 0.7233  | -0.4919 | 0.9105  | -0.8815 | -0.1714 | 0.3579  | -0.0626 | -0.8607 | -1.0649 | -0.1901 | -0.2047 | -0.8531 | 0.2928  | -0.1169 | 2.2514  |
|                                   | 5                                               | -0.6830 | 0.2676  | -0.0987 | 0.4010  | -0.9525 | -0.6561 | -2.5903 | 0.0207  | -0.2903 | -1.1884 | -0.1083 | 0.3605  | -0.3524 | -0.6780 | 0.3745  | 0.7439  | -0.6214 | 0.3244  | 0.9706  | -1.1081 | -0.1880 | -0.7916 | -0.2302 | -0.2387 | 0.3139  | -1.0902 | 0.3574  | 0.0812  | 0.8930  | 0.6771  |
|                                   | 6                                               | 0.1505  | -0.6359 | 0.3408  | -0.2139 | -0.4215 | -0.6090 | 0.0450  | 0.0333  | -0.9413 | 0.0510  | -1.2727 | 0.0581  | 0.0689  | 0.2270  | 0.4412  | -2.2157 | 1.1730  | 0.0689  | 0.3295  | -0.7895 | 1.1718  | 0.0001  | 1.0776  | 0.7578  | 0.5962  | -0.0068 | 0.3427  | 0.5114  | 0.3187  | 0.3662  |
|                                   | 7                                               | 0.2369  | -0.3205 | 0.6736  | -0.5381 | 0.3336  | -0.1755 | -0.4627 | 4.2397  | 0.2468  | 0.8822  | 0.1968  | -8.5088 | 0.2811  | 0.3645  | 0.0795  | -0.0677 | 0.8381  | -0.0040 | 0.0993  | -0.1411 | 0.2829  | -0.2519 | 0.1424  | 0.1374  | 0.4039  | 0.5474  | -0.0592 | -9.3986 | 0.7687  | -0.5509 |
|                                   | 8                                               | 1.3481  | 0.3123  | 1.2244  | -0.3711 | 0.2532  | -0.7997 | -0.0424 | -0.2882 | 0.0855  | 0.1066  | 0.6009  | 1.1292  | 0.6972  | 0.2498  | 0.3427  | 0.4745  | -0.0254 | -0.2120 | 1.0877  | 0.2617  | -0.0651 | -0.2184 | 0.2203  | -0.1940 | 0.1220  | 0.0883  | 0.4842  | -0.2160 | -0.2936 | -8.1706 |
|                                   | 9                                               | 0.3456  | -2.6089 | 0.0781  | -0.0658 | 0.6427  | 0.4659  | -0.3862 | 0.6314  | -0.1917 | 0.3225  | 0.2452  | -2.0249 | -0.8027 | 6.4941  | 0.3933  | -0.0108 | 0.0480  | 1.8253  | 0.2337  | -0.5574 | 1.0468  | -1.5356 | 0.3325  | -0.2956 | 0.4355  | -0.3032 | -0.4453 | -0.4111 | 0.1081  | -1.2391 |
|                                   | 10                                              | -1.0069 | 0.0589  | 0.2452  | 1.4012  | -0.5888 | 1.0447  | 0.7619  | -0.0473 | 0.5551  | -1.3477 | -0.1805 | -0.1615 | 0.1441  | 1.0517  | 0.5547  | 0.4409  | -0.8752 | 0.1919  | -0.2065 | 0.2987  | -0.0851 | 0.8452  | -0.5775 | -0.6016 | 0.4475  | -0.2413 | -0.6225 | 0.2967  | -0.5564 | 0.1493  |
|                                   | 11                                              | -0.4738 | 1.5493  | 0.6629  | 0.0145  | -0.6287 | -0.0121 | 0.4186  | -1.3803 | -0.1629 | -0.1505 | 0.4686  | -0.3949 | -0.3101 | 0.1838  | -0.6254 | -0.0748 | 1.1512  | 0.9971  | 2.1668  | -0.3151 | -0.0389 | 3.5921  | -0.3360 | -0.0349 | 0.1051  | 0.4232  | -0.7085 | 0.4465  | 0.0725  | 0.4840  |
|                                   | 12                                              | -0.4785 | -1.3164 | -0.4296 | 1.7102  | -0.7449 | -0.0320 | 0.4862  | -0.3705 | 0.2654  | -0.0344 | 0.4969  | 1.3439  | -0.2652 | -0.5421 | 0.1282  | 0.7684  | -1.2145 | -0.3090 | -0.7945 | -0.3665 | -0.0949 | -0.1184 | 0.5720  | -1.1395 | -0.3778 | 0.9683  | -0.1602 | 0.2393  | -0.4002 | -0.0331 |
|                                   | 13                                              | -0.3131 | 0.0421  | -0.6984 | 0.6255  | 0.3753  | -0.2192 | -0.0925 | -0.1126 | 0.1396  | -1.0839 | 0.2739  | -0.1044 | 0.2959  | 0.5314  | -0.2104 | -0.0014 | 0.1973  | -0.1039 | -0.1261 | 0.0808  | -0.0340 | 7.3915  | -0.8446 | 0.0417  | -0.3078 | -0.0318 | 0.0365  | -0.4914 | 0.2251  | -0.1556 |
|                                   | 14                                              | -0.1634 | 2.3682  | -0.2280 | -0.2078 | 0.0772  | 0.7924  | -0.5134 | -0.9015 | 1.0639  | -0.0534 | -0.0191 | -0.7089 | 0.3236  | -0.5131 | 0.4367  | 0.4765  | -0.0155 | -0.1236 | 0.1036  | 0.0503  | 0.5902  | -0.6691 | 0.2717  | 1.3109  | -0.8436 | 0.0201  | -1.3656 | 1.3893  | 0.0982  | 0.4853  |
|                                   | 15                                              | -0.0755 | -0.5130 | 1.8534  | 0.1614  | -0.2115 | -0.3945 | 0.6664  | -0.2040 | 0.6732  | -1.1993 | 0.0403  | -0.0074 | 0.1491  | 1.5663  | 0.7188  | -0.8343 | 0.6797  | -0.4792 | -1.3295 | 0.1561  | 0.4579  | -0.5242 | 0.8802  | 0.1988  | -0.3883 | 0.3958  | 0.2081  | 0.2713  | -0.4059 | -0.0466 |
| 16                                | -0.1524                                         | 0.3719  | 0.3701  | -0.2901 | 0.2045  | 0.4847  | 0.1867  | -0.3411 | 0.2622  | -0.8832 | -0.3948 | -0.0675 | -2.0440 | 0.0984  | 0.4644  | 0.9186  | 0.4300  | 1.1287  | -0.3479 | 0.0392  | 0.6758  | -0.3400 | -0.0550 | 0.2994  | -0.1433 | -0.0951 | -0.1322 | -1.4625 | -1.4096 | 0.1797  |         |

**Table S3.** The synapse values between  $k^{\text{th}}$  neuron in the second hidden layer and  $j^{\text{th}}$  neuron in the first hidden layer ( $w_{jk}^2$ );

|                                                 | The neuron number in the second hidden layer (k) |         |         |         |         |         |         |         |         |         |         |         |         |         |         |         |
|-------------------------------------------------|--------------------------------------------------|---------|---------|---------|---------|---------|---------|---------|---------|---------|---------|---------|---------|---------|---------|---------|
| The neuron number in the first hidden layer (j) |                                                  | 1       | 2       | 3       | 4       | 5       | 6       | 7       | 8       | 9       | 10      | 11      | 12      | 13      | 14      | 15      |
|                                                 | 1                                                | -0.3138 | -2.3008 | -0.4117 | -0.5524 | 1.4613  | 1.1172  | 0.2668  | -1.1979 | -0.5059 | 0.2043  | 1.8460  | -2.3757 | -1.1477 | 2.2287  | -7.1742 |
|                                                 | 2                                                | -0.8998 | 0.5491  | 0.7260  | -0.4307 | 0.5358  | 0.9055  | 0.4856  | 1.1395  | 0.2894  | 0.3933  | 1.2918  | -1.0645 | 0.9742  | -0.4298 | -0.7892 |
|                                                 | 3                                                | 1.9477  | 0.8823  | -0.4545 | -0.4567 | 1.3097  | -0.0269 | -1.7013 | -0.0390 | -0.1762 | -2.2036 | 0.0690  | -0.1723 | 0.1044  | -0.4665 | 1.3110  |
|                                                 | 4                                                | 2.6121  | 1.3411  | 1.4847  | 0.6816  | -0.4169 | 0.5024  | 0.5573  | -0.7705 | 4.5311  | -0.5346 | -0.9913 | 0.7595  | -0.1550 | -0.8267 | -0.6195 |
|                                                 | 5                                                | -0.0964 | -0.2476 | 0.1083  | 0.1954  | 0.0713  | 0.4318  | 0.2710  | 0.1628  | 0.8532  | 0.5017  | 0.0888  | 0.9106  | -0.5503 | 0.3960  | -0.2272 |
|                                                 | 6                                                | 0.1841  | -0.3876 | -1.2231 | 0.0886  | -1.2919 | 0.5600  | 0.4124  | -0.2928 | -0.0605 | -0.3924 | -0.4198 | 0.1389  | 1.5344  | 0.1534  | -0.5346 |
|                                                 | 7                                                | 1.8897  | 0.8297  | -0.3889 | -0.3834 | 1.0805  | -0.0622 | -1.1613 | 0.2956  | -0.2605 | -0.8941 | 0.0138  | -0.2696 | -0.0177 | -0.8397 | 1.8950  |
|                                                 | 8                                                | 2.0473  | 0.9770  | 0.9874  | 0.5156  | -0.6894 | 0.2750  | 0.1552  | -0.6716 | 2.0739  | -0.5633 | -0.5482 | 0.5103  | -0.1244 | -0.7770 | -0.2530 |
|                                                 | 9                                                | -0.2652 | 0.9304  | 0.5386  | 0.1780  | 0.4322  | -0.0206 | 0.0016  | 0.0649  | -0.9858 | -0.2114 | -0.4401 | 0.2190  | 1.1378  | -0.0886 | 0.5870  |
|                                                 | 10                                               | -0.0762 | 0.3372  | 0.6583  | -0.6652 | -0.1204 | -0.0505 | -0.1465 | 0.8536  | 0.3843  | 0.9624  | 0.3926  | -0.2260 | -1.5262 | 0.0243  | 0.0786  |
|                                                 | 11                                               | 0.0608  | 0.8084  | -0.6531 | -0.4710 | 0.2063  | 0.1275  | -0.9825 | 0.0218  | 1.0972  | 0.2069  | 1.0957  | -0.4673 | 1.2503  | -0.0635 | -1.1970 |
|                                                 | 12                                               | -0.5332 | 0.5635  | 0.2677  | 1.2111  | 0.5323  | 1.0029  | 0.8965  | -0.9686 | -0.6074 | 0.0642  | -0.3274 | -0.4990 | 0.4432  | -0.6709 | 0.7970  |
|                                                 | 13                                               | -0.4481 | -0.3113 | -1.3498 | -0.8769 | 0.0614  | 0.0145  | -0.5272 | -1.7892 | -0.0952 | 1.0738  | 0.4906  | -0.2413 | 0.1790  | -0.7657 | -0.9760 |
|                                                 | 14                                               | -0.1769 | -0.2104 | -1.5641 | 0.3608  | -0.2019 | -0.6300 | -0.3469 | -0.4964 | -0.3940 | -0.7929 | 0.0176  | 0.0264  | 0.0256  | 0.5960  | 1.5023  |
|                                                 | 15                                               | -1.5279 | -0.7317 | 1.0224  | -0.6169 | 0.6755  | 0.0656  | 0.6034  | -0.1494 | 0.0255  | 1.0148  | 1.3243  | -0.8797 | 0.8315  | -2.0652 | -0.6868 |
|                                                 | 16                                               | -0.2023 | 0.0160  | -0.3764 | 0.2791  | 0.3736  | 0.9116  | -1.0802 | -0.2201 | -0.3459 | -0.5805 | -0.7041 | -0.9626 | 0.3505  | -0.9136 | 1.4142  |
|                                                 | 17                                               | -0.9339 | 0.4841  | 1.3261  | 0.4702  | 0.0387  | 0.1718  | -0.0213 | 0.3381  | -0.1363 | -0.8062 | 0.5641  | 0.6668  | -0.0901 | 1.0512  | -0.9078 |
|                                                 | 18                                               | 0.0844  | -0.1499 | 0.1405  | -0.3113 | 0.3775  | 1.2348  | 0.6419  | 0.0011  | -0.1832 | -0.6746 | 0.9862  | 0.3283  | -1.1659 | -0.7608 | -0.1727 |
|                                                 | 19                                               | 1.0716  | -1.0103 | 1.4809  | -0.0311 | 0.5282  | 0.0506  | -0.6021 | 0.8338  | 0.7309  | 0.3036  | -0.1186 | 0.4298  | 0.5592  | -0.2806 | -1.6374 |
|                                                 | 20                                               | 0.5195  | -0.1445 | 1.2624  | -0.1182 | 0.4699  | 1.3508  | 0.4970  | -0.6888 | -0.9244 | 0.3749  | 0.0185  | -0.0741 | 1.0159  | -0.4134 | -0.8599 |
|                                                 | 21                                               | -0.7910 | -0.0454 | 0.5815  | -0.2324 | 0.3338  | 0.0452  | -0.4281 | -0.6210 | 0.0166  | -0.4424 | 0.6640  | 0.2154  | -0.1885 | -0.6739 | 0.2927  |
|                                                 | 22                                               | -0.1353 | 0.2696  | 0.2138  | 0.2446  | 0.0798  | 0.3623  | 0.1807  | -0.1771 | 0.0052  | 0.0543  | -0.1929 | -0.5046 | 0.1770  | -0.4281 | -0.2051 |
|                                                 | 23                                               | -5.1012 | 0.8823  | -1.2750 | 0.6532  | -1.8287 | 0.0502  | 0.3077  | -1.0978 | 1.3960  | 0.1623  | -0.5407 | 0.3577  | -0.6614 | 0.6925  | 0.4584  |
|                                                 | 24                                               | -3.4840 | -0.2290 | -1.0518 | -2.2040 | 0.8321  | -2.3610 | 0.3765  | 1.4776  | -1.6170 | -0.8543 | -0.9499 | 0.1757  | 0.2491  | 0.0376  | 1.9007  |
|                                                 | 25                                               | -0.3416 | -0.4754 | 0.3880  | 0.4945  | -0.5679 | 0.0082  | 0.7587  | -0.3255 | -0.0862 | 0.0241  | 0.4706  | -0.9931 | -0.0236 | 0.2768  | -1.4009 |
|                                                 | 26                                               | -0.1045 | -0.2894 | -0.7834 | 0.0347  | 0.5338  | 0.0228  | -0.4291 | 0.0439  | 0.2914  | -0.8001 | 0.4409  | 0.1345  | 0.1398  | -0.0495 | 0.4239  |
|                                                 | 27                                               | 0.1364  | -1.3655 | -0.0447 | -1.3130 | 0.9238  | -0.0373 | -0.2022 | 0.4438  | -0.7588 | 1.3445  | -0.3695 | 0.4377  | 0.5067  | 0.6377  | -0.4750 |
|                                                 | 28                                               | -1.1109 | 0.2393  | -0.0091 | 1.4154  | -0.2571 | 0.8760  | -0.2978 | -0.9701 | -2.0139 | 0.2287  | -2.3044 | -0.8265 | -0.7967 | 0.3379  | -0.1544 |
|                                                 | 29                                               | -0.3596 | 0.6202  | -0.2261 | 0.3033  | 1.0726  | 0.6698  | -0.0804 | -1.2673 | 0.1062  | 0.7120  | -0.3275 | 3.9514  | -4.5485 | -2.2443 | -0.7037 |
| 30                                              | -1.4628                                          | 0.8502  | 0.7107  | 0.4344  | 0.8688  | 0.1570  | 0.8043  | 0.6581  | 0.4775  | 0.3196  | 2.0734  | 0.3099  | -0.6549 | -0.6747 | -0.4457 |         |
